# Supplementary material
Source: publisher site journal article supplement (https://www.dovepress.com/article/supplementary_file/544136/544136%20Supplementary%20files_1.docx)
Supplement: Supplementary file 1 [file 544136%20Supplementary%20files_1.docx]

| **Gene** | **FP** | **RP** |
| --- | --- | --- |
| CD80 | GTCGCCTCTCTGAAGATTACCC | GCTCACGTAGAAGACCCTCC |
| CD84 | TCTGCTTGTTCTCATTCTGTCTTC | TGTGTTCACTGGCTCTTCCTT |
| CD274 | CTGGCATTTGCTGAACGCAT | AGGTCTTCCTCTCCATGCAC |
| IL15 | GGCCCAAAGCACCTAACCTA | AGGAAGCCCTGCACTGAAAC |
| IL10 | CCAGACATCAAGGCGCATGT | CATTCTTCACCTGCTCCACGG |
| TIGIT | CCCTCGCCTCAGGAATGATG | ACAAATGGCCAGAAGCTGGT |
| IL2 | ACTCACCAGGATGCTCACATT | CAAGTCAGTGTTGAGATGATGCT |
| GAPDH | CTCCCACTCTTCCACCTTCG | TTGCTGTAGCCGTATTCATT |
| ACTB | CATGTACGTTGCTATCCAGGC | CTCCTTAATGTCACGCACGAT |

**Supplemental Table 1.** Primer sequences

**Supplemental Table 2.** Downregulated genes in CPX group

| Gene.symbol | CPX4 | CPX5 | CPX6 | DMSO4 | DMSO5 | DMSO6 |
| --- | --- | --- | --- | --- | --- | --- |
| AHNAK | 10885 | 6463 | 8497 | 21489 | 32075 | 24547 |
| PLEC | 14040 | 11951 | 10926 | 20717 | 26311 | 23997 |
| TUBB | 5256 | 6262 | 5936 | 9762 | 12183 | 13016 |
| MDFIC | 4687 | 5038 | 3989 | 7211 | 9539 | 8577 |
| PAX5 | 2926 | 2825 | 2771 | 4678 | 6212 | 4501 |
| LMNA | 5596 | 6441 | 5976 | 11339 | 16019 | 7754 |
| ADGRE5 | 5506 | 6896 | 6368 | 10244 | 14367 | 9436 |
| MKI67 | 2130 | 1606 | 2752 | 4032 | 5827 | 8429 |
| RESF1 | 3311 | 2294 | 1920 | 8211 | 6705 | 3316 |
| VOPP1 | 2800 | 2884 | 2182 | 5154 | 4980 | 4050 |
| CBX6 | 3307 | 4346 | 5114 | 6690 | 10838 | 8989 |
| GBP2 | 1936 | 2903 | 1893 | 3848 | 5584 | 6151 |
| HDAC9 | 2601 | 2589 | 2159 | 6042 | 7315 | 5437 |
| BMF | 620 | 780 | 755 | 1561 | 2626 | 2524 |
| CDK6 | 3472 | 2843 | 2202 | 6389 | 8290 | 5786 |
| MCM3 | 1458 | 1258 | 1129 | 2117 | 2432 | 2462 |
| TOP2A | 1078 | 1175 | 1613 | 2181 | 3018 | 4476 |
| DTX3L | 1799 | 2186 | 2339 | 3448 | 4913 | 4321 |
| NSD2 | 1783 | 1681 | 1758 | 2595 | 3571 | 3906 |
| TMED8 | 1660 | 1558 | 1957 | 2526 | 3673 | 3659 |
| IRF5 | 1048 | 1419 | 1150 | 2234 | 2816 | 2421 |
| PLXNA1 | 1274 | 925 | 1166 | 2565 | 2324 | 1636 |
| NFATC2 | 1740 | 1697 | 1650 | 2616 | 3162 | 3525 |
| FAR1 | 1550 | 1318 | 1489 | 2673 | 2830 | 2868 |
| FCHSD2 | 720 | 734 | 892 | 1341 | 1854 | 1483 |
| VAT1 | 576 | 610 | 667 | 1047 | 1180 | 1272 |
| TTLL12 | 917 | 1057 | 997 | 2828 | 2158 | 1382 |
| CFAP97 | 1201 | 1133 | 1110 | 2122 | 2211 | 2093 |
| ANKRD28 | 1156 | 1127 | 1134 | 2112 | 2860 | 1738 |
| TTF2 | 891 | 961 | 1029 | 2207 | 2930 | 1910 |
| PKIG | 513 | 718 | 566 | 1004 | 1457 | 1184 |
| CENPF | 469 | 407 | 715 | 1060 | 1501 | 1003 |
| NEK6 | 706 | 511 | 588 | 1320 | 1294 | 1109 |
| MORC2 | 860 | 842 | 693 | 1765 | 2093 | 1031 |
| ATP6V0A2 | 1102 | 954 | 916 | 1904 | 1871 | 1696 |
| ZBTB32 | 808 | 1560 | 996 | 1815 | 4194 | 2502 |
| CRYBG1 | 480 | 450 | 684 | 915 | 1308 | 1183 |
| DYRK2 | 572 | 642 | 687 | 1012 | 1312 | 1192 |
| PCID2 | 827 | 1014 | 796 | 1500 | 2119 | 1324 |
| ATP8B2 | 814 | 835 | 937 | 1625 | 1821 | 1171 |
| LEMD2 | 632 | 684 | 744 | 1086 | 1321 | 1279 |
| ASPM | 449 | 453 | 764 | 1053 | 1909 | 1187 |
| CD84 | 111 | 94 | 154 | 307 | 479 | 345 |
| INCENP | 291 | 278 | 374 | 707 | 923 | 1069 |
| KIF1C | 377 | 394 | 330 | 811 | 753 | 525 |
| KCNC4 | 530 | 548 | 505 | 875 | 1304 | 921 |
| AMIGO2 | 494 | 521 | 540 | 1288 | 1173 | 1326 |
| COBLL1 | 521 | 540 | 451 | 1026 | 1247 | 1050 |
| CCNB1 | 421 | 486 | 472 | 769 | 1034 | 671 |
| N4BP2 | 632 | 419 | 489 | 912 | 1132 | 1244 |
| MAML2 | 594 | 521 | 471 | 916 | 1153 | 1215 |
| ENPP4 | 808 | 623 | 649 | 1266 | 1436 | 1189 |
| NHLRC2 | 363 | 356 | 396 | 564 | 966 | 699 |
| MBNL3 | 430 | 286 | 468 | 675 | 959 | 809 |
| TFEC | 493 | 393 | 350 | 1030 | 1016 | 1076 |
| MAP3K4 | 432 | 329 | 347 | 743 | 702 | 766 |
| MTAP | 624 | 655 | 646 | 1133 | 1393 | 899 |
| TBC1D14 | 297 | 322 | 307 | 659 | 724 | 443 |
| HOMER2 | 380 | 411 | 396 | 923 | 1192 | 544 |
| DOP1B | 480 | 467 | 440 | 883 | 927 | 740 |
| SLC29A1 | 653 | 578 | 340 | 1527 | 1154 | 889 |
| CENPC | 464 | 428 | 501 | 699 | 953 | 842 |
| CCNA2 | 285 | 344 | 299 | 575 | 844 | 841 |
| ICMT | 443 | 398 | 312 | 731 | 818 | 584 |
| ZNF507 | 366 | 301 | 509 | 866 | 927 | 1230 |
| TP73-AS1 | 301 | 375 | 308 | 681 | 741 | 577 |
| TTC13 | 336 | 382 | 336 | 655 | 798 | 474 |
| RANBP6 | 319 | 303 | 306 | 548 | 763 | 585 |
| CEP152 | 405 | 306 | 326 | 764 | 980 | 1014 |
| CD274 | 434 | 433 | 483 | 773 | 927 | 1719 |
| BRD3 | 425 | 439 | 343 | 739 | 925 | 565 |
| FAN1 | 219 | 272 | 249 | 390 | 571 | 398 |
| GPR174 | 332 | 406 | 292 | 515 | 922 | 717 |
| TRNT1 | 454 | 410 | 424 | 738 | 789 | 747 |
| RPE | 444 | 427 | 404 | 701 | 784 | 736 |
| ZSCAN18 | 381 | 351 | 372 | 588 | 760 | 663 |
| PKP4 | 265 | 346 | 279 | 608 | 778 | 652 |
| HJURP | 275 | 261 | 430 | 621 | 750 | 899 |
| PRMT3 | 415 | 606 | 464 | 915 | 1120 | 753 |
| CCNF | 152 | 148 | 161 | 330 | 371 | 400 |
| ANGEL1 | 353 | 441 | 427 | 707 | 874 | 666 |
| UNG | 231 | 209 | 212 | 367 | 515 | 519 |
| DCAF17 | 250 | 257 | 278 | 416 | 644 | 542 |
| B3GNT7 | 378 | 342 | 336 | 663 | 628 | 690 |
| KIF23 | 193 | 221 | 344 | 518 | 606 | 865 |
| SORD | 371 | 377 | 370 | 913 | 958 | 507 |
| PAXIP1 | 310 | 262 | 298 | 561 | 524 | 785 |
| CYP1B1 | 77 | 68 | 77 | 395 | 198 | 107 |
| USP45 | 334 | 293 | 324 | 506 | 634 | 566 |
| BUB1B | 157 | 138 | 257 | 371 | 489 | 794 |
| NDC80 | 203 | 177 | 253 | 437 | 441 | 673 |
| MT-TC | 55 | 19 | 49 | 626 | 516 | 193 |
| LMO2 | 263 | 332 | 166 | 846 | 911 | 391 |
| FYCO1 | 203 | 218 | 212 | 422 | 675 | 827 |
| LPCAT4 | 147 | 226 | 192 | 321 | 649 | 477 |
| B4GALT2 | 359 | 518 | 348 | 1037 | 1071 | 591 |
| LRRC8B | 397 | 454 | 407 | 817 | 1000 | 561 |
| MAP7D3 | 365 | 365 | 322 | 603 | 668 | 566 |
| METTL8 | 227 | 222 | 209 | 425 | 541 | 444 |
| ATP2B4 | 175 | 125 | 123 | 419 | 436 | 262 |
| ZNF514 | 115 | 162 | 187 | 273 | 426 | 278 |
| PALB2 | 283 | 256 | 277 | 456 | 534 | 463 |
| STX2 | 280 | 337 | 292 | 721 | 731 | 454 |
| DSTN | 165 | 199 | 151 | 284 | 378 | 377 |
| TTLL5 | 242 | 226 | 227 | 389 | 572 | 524 |
| KIF18B | 160 | 183 | 163 | 309 | 423 | 478 |
| LIPE | 241 | 264 | 234 | 491 | 747 | 322 |
| DCLRE1A | 205 | 182 | 181 | 355 | 420 | 294 |
| CDCA7 | 177 | 89 | 151 | 343 | 266 | 520 |
| FAM214B | 161 | 230 | 201 | 448 | 550 | 401 |
| MMD | 177 | 246 | 206 | 451 | 725 | 616 |
| SEPSECS | 169 | 168 | 159 | 258 | 420 | 372 |
| CD80 | 189 | 83 | 117 | 360 | 279 | 596 |
| CD226 | 341 | 255 | 176 | 797 | 921 | 471 |
| RAB11FIP2 | 239 | 210 | 194 | 411 | 455 | 353 |
| NUDT16 | 81 | 120 | 144 | 341 | 386 | 190 |
| LINC02210 | 154 | 210 | 180 | 261 | 525 | 383 |
| GINS1 | 54 | 67 | 114 | 158 | 201 | 441 |
| ETAA1 | 129 | 128 | 120 | 249 | 310 | 453 |
| ARNTL2 | 249 | 312 | 225 | 459 | 589 | 653 |
| FBXO5 | 133 | 115 | 158 | 260 | 270 | 408 |
| GTPBP3 | 165 | 216 | 122 | 349 | 491 | 269 |
| TRIM14 | 111 | 202 | 196 | 375 | 551 | 319 |
| HNRNPLL | 161 | 197 | 176 | 307 | 421 | 316 |
| USP31 | 255 | 146 | 169 | 585 | 499 | 359 |
| GCFC2 | 248 | 250 | 254 | 500 | 529 | 354 |
| IRS1 | 167 | 116 | 182 | 308 | 420 | 270 |
| ZNF319 | 159 | 158 | 123 | 371 | 415 | 204 |
| CKAP2L | 152 | 168 | 176 | 392 | 505 | 420 |
| ACVR2B | 147 | 136 | 204 | 327 | 420 | 639 |
| GPAM | 100 | 123 | 124 | 318 | 310 | 163 |
| SUV39H2 | 144 | 122 | 134 | 224 | 290 | 306 |
| PPARGC1B | 114 | 150 | 113 | 441 | 511 | 329 |
| MAPK12 | 89 | 130 | 80 | 243 | 267 | 179 |
| TSC22D1 | 142 | 124 | 155 | 293 | 396 | 231 |
| ACTR5 | 184 | 175 | 186 | 376 | 348 | 396 |
| FANCF | 94 | 126 | 117 | 233 | 317 | 180 |
| ECT2 | 102 | 95 | 130 | 202 | 284 | 302 |
| NEMP2 | 155 | 121 | 134 | 230 | 296 | 364 |
| CASZ1 | 236 | 180 | 135 | 418 | 453 | 300 |
| ALDH1B1 | 165 | 193 | 155 | 360 | 400 | 280 |
| CAV1 | 39 | 40 | 26 | 174 | 148 | 153 |
| ALKBH8 | 174 | 177 | 179 | 322 | 382 | 268 |
| DPY19L4 | 90 | 64 | 65 | 138 | 182 | 182 |
| CCNE1 | 92 | 59 | 69 | 189 | 191 | 202 |
| ZDHHC23 | 90 | 146 | 129 | 236 | 314 | 265 |
| RUNX2 | 174 | 236 | 244 | 517 | 564 | 630 |
| HCG11 | 80 | 92 | 81 | 191 | 234 | 164 |
| TRIP13 | 122 | 154 | 107 | 281 | 328 | 207 |
| AMER1 | 76 | 118 | 119 | 232 | 324 | 274 |
| ANLN | 45 | 36 | 57 | 82 | 126 | 239 |
| MT-TY | 19 | 8 | 26 | 292 | 251 | 34 |
| CRNDE | 138 | 153 | 139 | 370 | 435 | 378 |
| TMOD2 | 51 | 72 | 65 | 90 | 216 | 201 |
| TSPYL5 | 116 | 118 | 132 | 243 | 242 | 257 |
| TMTC4 | 58 | 82 | 85 | 286 | 221 | 141 |
| ITPRIPL1 | 86 | 168 | 116 | 274 | 357 | 315 |
| PCYOX1L | 49 | 95 | 62 | 145 | 219 | 131 |
| CMAHP | 88 | 125 | 136 | 301 | 465 | 276 |
| ALG10 | 74 | 98 | 67 | 132 | 229 | 178 |
| SLC45A3 | 107 | 141 | 139 | 284 | 293 | 246 |
| C18orf54 | 64 | 56 | 55 | 100 | 140 | 310 |
| LINC02416 | 103 | 145 | 146 | 307 | 397 | 474 |
| GALNT12 | 105 | 132 | 97 | 221 | 248 | 289 |
| CLIC5 | 145 | 139 | 165 | 445 | 431 | 443 |
| LINC00158 | 108 | 168 | 112 | 185 | 444 | 635 |
| DGAT2 | 48 | 71 | 75 | 223 | 245 | 175 |
| MT-TN | 32 | 23 | 20 | 124 | 125 | 83 |
| FAM86B3P | 61 | 86 | 82 | 128 | 272 | 176 |
| PLD6 | 66 | 76 | 100 | 295 | 210 | 271 |
| IL15 | 71 | 102 | 89 | 172 | 263 | 212 |
| CENPA | 64 | 60 | 39 | 175 | 223 | 124 |
| ZNF660 | 41 | 51 | 39 | 96 | 113 | 89 |
| LRRC8C-DT | 70 | 63 | 35 | 213 | 204 | 84 |
| TIGIT | 32 | 68 | 56 | 127 | 257 | 123 |
| KCTD6 | 37 | 31 | 26 | 94 | 100 | 102 |
| RAD50 | 63 | 49 | 50 | 103 | 140 | 138 |
| FAM86DP | 61 | 63 | 90 | 227 | 226 | 128 |
| TMEM231 | 60 | 83 | 45 | 156 | 252 | 104 |
| FAM72B | 37 | 47 | 63 | 118 | 166 | 164 |
| TCTN2 | 46 | 53 | 34 | 87 | 149 | 118 |
| CSF2 | 60 | 116 | 65 | 218 | 371 | 178 |
| IL10 | 35 | 64 | 43 | 153 | 202 | 280 |
| GARNL3 | 38 | 50 | 45 | 156 | 153 | 101 |
| PLAU | 19 | 60 | 35 | 259 | 296 | 71 |
| STOML1 | 22 | 30 | 37 | 70 | 123 | 72 |
| TRERF1 | 15 | 31 | 19 | 122 | 170 | 58 |
| MLF1 | 30 | 54 | 40 | 113 | 160 | 91 |
| TNFRSF8 | 38 | 37 | 24 | 101 | 105 | 107 |
| AL356276.1 | 16 | 22 | 11 | 31 | 131 | 75 |
| DLG5 | 23 | 16 | 19 | 63 | 81 | 47 |
| FAM72D | 13 | 18 | 23 | 41 | 67 | 111 |
| IL2 | 14 | 29 | 3 | 228 | 200 | 12 |
| TRIM6 | 18 | 25 | 16 | 28 | 96 | 133 |
| PTCHD1 | 15 | 5 | 12 | 66 | 64 | 30 |
| ALG1L13P | 13 | 14 | 15 | 33 | 59 | 53 |
| AL353152.2 | 14 | 14 | 18 | 35 | 48 | 119 |
| ENPP5 | 8 | 8 | 11 | 24 | 32 | 97 |
| ZNF385C | 17 | 20 | 15 | 31 | 48 | 171 |
| AL590550.1 | 3 | 18 | 18 | 41 | 169 | 79 |
| PPIAP45 | 4 | 11 | 14 | 37 | 45 | 56 |
| CD2 | 8 | 24 | 13 | 39 | 91 | 91 |
| TOX | 2 | 2 | 1 | 23 | 33 | 26 |
| AL049830.3 | 1 | 2 | 2 | 8 | 19 | 27 |
| MT-TV | 6 | 2 | 3 | 46 | 38 | 25 |
| CFAP69 | 9 | 14 | 9 | 44 | 79 | 27 |
| MAPK10 | 6 | 3 | 2 | 35 | 34 | 22 |
| AC092112.1 | 1 | 3 | 2 | 7 | 40 | 17 |

**Supplemental Table 3.** Upregulated genes in CPX group

| Gene.symbol | CPX1 | CPX2 | CPX3 | DMSO1 | DMSO2 | DMSO3 |
| --- | --- | --- | --- | --- | --- | --- |
| LDHA | 50980 | 43811 | 35320 | 11252 | 13297 | 23587 |
| UBC | 26345 | 24190 | 22574 | 13394 | 17327 | 14404 |
| MT2A | 990 | 256 | 120 | 117 | 177 | 86 |
| HSPH1 | 5391 | 4138 | 4715 | 3286 | 3243 | 1992 |
| HMOX1 | 2378 | 1314 | 849 | 142 | 93 | 142 |
| MOB3A | 19320 | 19855 | 16692 | 8221 | 10164 | 10823 |
| TXNRD1 | 8291 | 4488 | 4474 | 3514 | 2989 | 2344 |
| HK2 | 32127 | 22013 | 20725 | 6842 | 6560 | 11500 |
| HSPA1A | 2425 | 2245 | 2500 | 777 | 211 | 522 |
| HK1 | 13614 | 11841 | 9927 | 4546 | 4743 | 6464 |
| FTH1 | 6616 | 6081 | 9295 | 4207 | 5198 | 4160 |
| GRB2 | 10642 | 9863 | 9743 | 6483 | 8251 | 6100 |
| ZMIZ1 | 12434 | 10006 | 11572 | 8092 | 8310 | 7094 |
| CXCR4 | 14967 | 13650 | 12717 | 6736 | 7463 | 5810 |
| PFKFB3 | 9816 | 6958 | 9049 | 3197 | 3026 | 3626 |
| DNAJB6 | 4597 | 3780 | 4121 | 3002 | 3576 | 2201 |
| PSD4 | 9627 | 7942 | 9130 | 7015 | 7247 | 6221 |
| DNAJA1 | 4339 | 3156 | 3675 | 2539 | 2499 | 2109 |
| NR4A3 | 18600 | 13262 | 17601 | 5492 | 8482 | 8366 |
| DNAJB1 | 3258 | 4279 | 4040 | 1046 | 928 | 1701 |
| P4HB | 10162 | 8101 | 6267 | 4916 | 5076 | 5202 |
| DDIT4 | 15832 | 12942 | 13339 | 4858 | 4693 | 9979 |
| PFKP | 14168 | 11876 | 8945 | 7730 | 8609 | 4261 |
| ITGB2 | 13629 | 14937 | 11444 | 3746 | 6032 | 6886 |
| SUPT5H | 6696 | 5828 | 7307 | 5029 | 5681 | 4378 |
| SLCO4A1 | 13858 | 12541 | 9697 | 8182 | 7614 | 7038 |
| WDR26 | 9306 | 7019 | 8372 | 5904 | 7080 | 5601 |
| TOP2B | 8252 | 7882 | 7269 | 4938 | 7323 | 4948 |
| CSRNP1 | 15560 | 12072 | 11643 | 6318 | 6684 | 6786 |
| FOSB | 14768 | 10476 | 15889 | 7521 | 7226 | 6064 |
| PIK3AP1 | 6804 | 7000 | 5708 | 3978 | 5872 | 3396 |
| MAP1LC3B | 7795 | 6855 | 6300 | 5702 | 5776 | 3163 |
| CDKN1A | 9632 | 9156 | 8602 | 4533 | 4713 | 7043 |
| NSMF | 7875 | 7248 | 5477 | 2243 | 2434 | 2302 |
| SLC2A1 | 12497 | 9811 | 6855 | 1653 | 1908 | 3775 |
| JUND | 6209 | 8078 | 7284 | 4046 | 6082 | 3677 |
| LY9 | 5839 | 5519 | 7146 | 4771 | 5043 | 2551 |
| SCD | 7206 | 8398 | 10235 | 2620 | 3743 | 6403 |
| MGAT1 | 7760 | 8016 | 5973 | 3005 | 3257 | 3029 |
| AMPD3 | 8696 | 8070 | 8381 | 4039 | 5966 | 3140 |
| HSPA1B | 1076 | 1259 | 1466 | 362 | 153 | 536 |
| ZBTB1 | 7135 | 5304 | 6170 | 1298 | 1855 | 3696 |
| LONP1 | 7441 | 6794 | 5060 | 4190 | 5029 | 3826 |
| PLEK | 6590 | 6719 | 4877 | 3100 | 4817 | 4231 |
| TSPYL2 | 3421 | 3118 | 4041 | 2141 | 2795 | 2586 |
| PER1 | 7828 | 8053 | 9184 | 2764 | 3841 | 5185 |
| VEGFA | 10080 | 8350 | 8080 | 2064 | 2507 | 4855 |
| DNAJA4 | 1220 | 1085 | 1197 | 570 | 584 | 290 |
| ST3GAL1 | 7728 | 6248 | 7975 | 5257 | 6414 | 3997 |
| BNIP3L | 6957 | 6029 | 5191 | 664 | 1021 | 3014 |
| NXF1 | 5229 | 4220 | 4236 | 3225 | 3313 | 1814 |
| FOSL2 | 7081 | 5974 | 9888 | 2643 | 4501 | 4334 |
| PDXK | 3510 | 3654 | 3719 | 1654 | 2800 | 2584 |
| NFATC1 | 5531 | 4921 | 4923 | 2193 | 2775 | 3582 |
| MT1E | 86 | 20 | 7 | 1 | 0 | 0 |
| TENT5C | 3479 | 4608 | 4538 | 1224 | 2803 | 2753 |
| ZFP36L2 | 7847 | 7632 | 5425 | 2763 | 3375 | 3125 |
| MALT1 | 5191 | 4556 | 6168 | 3479 | 4342 | 3441 |
| ERO1A | 8712 | 6860 | 6505 | 1717 | 2297 | 3610 |
| RIOK3 | 6155 | 5370 | 4991 | 3294 | 4143 | 3856 |
| DDX24 | 4781 | 4370 | 4764 | 3353 | 3644 | 3581 |
| SLC16A3 | 5770 | 6034 | 4976 | 718 | 1137 | 2364 |
| INSIG2 | 6989 | 7146 | 9190 | 2304 | 3658 | 4741 |
| RNASET2 | 4707 | 5808 | 4372 | 639 | 1093 | 3371 |
| EIF2AK3 | 5664 | 4609 | 5114 | 3634 | 4445 | 3135 |
| CRKL | 4786 | 3965 | 4349 | 2588 | 2959 | 3454 |
| POM121C | 5525 | 4681 | 4987 | 2727 | 3197 | 2801 |
| N4BP3 | 7944 | 6765 | 6621 | 1192 | 1689 | 3243 |
| HSPA6 | 761 | 1026 | 855 | 87 | 60 | 128 |
| ZNF395 | 4828 | 3845 | 3870 | 929 | 1011 | 2928 |
| SASH3 | 3372 | 3444 | 3103 | 2532 | 3205 | 1805 |
| MACROD2 | 4753 | 7560 | 3370 | 1967 | 4311 | 2481 |
| SLC25A36 | 5272 | 4345 | 3808 | 2226 | 3222 | 3431 |
| NGLY1 | 6772 | 5637 | 6717 | 1644 | 2344 | 3748 |
| JOSD1 | 4811 | 4205 | 5060 | 3416 | 4490 | 2730 |
| PDE7A | 3003 | 3272 | 3833 | 2436 | 3140 | 2243 |
| NDRG1 | 4524 | 3467 | 3496 | 1675 | 2074 | 1552 |
| PNRC1 | 4033 | 3924 | 3483 | 1359 | 1808 | 2389 |
| AP5B1 | 3312 | 3056 | 2977 | 1365 | 2039 | 1087 |
| MAP2K1 | 5917 | 5008 | 3746 | 2183 | 2426 | 2256 |
| KDM7A | 5244 | 3352 | 4640 | 1904 | 2071 | 2145 |
| DDX41 | 3318 | 3136 | 2247 | 1843 | 1971 | 980 |
| FOS | 7021 | 5935 | 6281 | 4543 | 5082 | 4163 |
| POM121 | 5434 | 4094 | 4354 | 3201 | 3063 | 2266 |
| ZHX2 | 2938 | 1948 | 2246 | 1200 | 1523 | 1442 |
| DNAJB2 | 3125 | 3225 | 2910 | 1034 | 1703 | 1505 |
| SEC24A | 7251 | 4941 | 5565 | 1885 | 2053 | 3279 |
| ALKBH5 | 5472 | 4691 | 3988 | 1588 | 1883 | 2229 |
| PLEKHA2 | 2893 | 2615 | 2751 | 1121 | 1571 | 1788 |
| TENT4A | 5787 | 4461 | 5067 | 2498 | 2960 | 3498 |
| USP11 | 3725 | 3740 | 3428 | 2636 | 3358 | 1841 |
| ATP6V0A1 | 1920 | 2135 | 2072 | 1283 | 2111 | 1075 |
| BAG3 | 1304 | 1018 | 935 | 467 | 335 | 354 |
| ARID5A | 3619 | 3875 | 4264 | 2738 | 3614 | 2507 |
| EHBP1L1 | 3001 | 2908 | 3557 | 1917 | 2482 | 2034 |
| TUBA4A | 2894 | 3577 | 3058 | 1240 | 1599 | 1688 |
| SLC12A7 | 2479 | 2506 | 1977 | 1509 | 1931 | 1402 |
| GUK1 | 4218 | 4142 | 5348 | 1669 | 2175 | 2620 |
| VPS37B | 4108 | 3630 | 4596 | 2651 | 3024 | 1622 |
| LGALS8 | 3728 | 2612 | 3208 | 1070 | 1329 | 1948 |
| RB1 | 3437 | 2910 | 3358 | 1952 | 2857 | 2432 |
| ARRDC2 | 2754 | 2660 | 3278 | 1418 | 1804 | 2203 |
| EIF4A3 | 3880 | 3390 | 3237 | 2735 | 2334 | 2086 |
| ATP6V0D1 | 2002 | 2093 | 2033 | 1441 | 1869 | 1392 |
| SLC15A4 | 2839 | 2549 | 3125 | 1527 | 1728 | 2027 |
| LDLRAD4 | 4312 | 3848 | 4207 | 2505 | 3400 | 2786 |
| GCLM | 1152 | 752 | 940 | 406 | 371 | 357 |
| KDM5B | 3764 | 2589 | 2327 | 1924 | 2096 | 1935 |
| BIN1 | 2313 | 2431 | 2465 | 1286 | 1594 | 1546 |
| RASAL1 | 1126 | 1367 | 1230 | 448 | 571 | 890 |
| NR4A2 | 3120 | 3915 | 6680 | 1070 | 3013 | 1644 |
| RYBP | 4403 | 3206 | 3484 | 2016 | 1984 | 2284 |
| IMPAD1 | 4115 | 3483 | 3751 | 2336 | 2810 | 2425 |
| EGLN1 | 1882 | 1229 | 967 | 195 | 210 | 413 |
| MARCKS | 2347 | 1830 | 1406 | 1325 | 1265 | 1133 |
| RIC8A | 2029 | 2598 | 2550 | 1682 | 2075 | 1368 |
| RLF | 2638 | 1954 | 2512 | 1091 | 1276 | 1835 |
| UBE2O | 2929 | 2861 | 2580 | 1756 | 1969 | 1741 |
| LUZP1 | 2160 | 1200 | 1292 | 837 | 950 | 888 |
| CREM | 2815 | 3014 | 4914 | 1406 | 2475 | 883 |
| CCDC47 | 2911 | 2621 | 2632 | 1947 | 2334 | 1665 |
| MT1X | 130 | 23 | 4 | 8 | 7 | 1 |
| P4HA1 | 4115 | 3020 | 2740 | 459 | 557 | 1904 |
| SKI | 3150 | 2774 | 2997 | 1406 | 1632 | 2178 |
| PDK1 | 3289 | 2274 | 2305 | 905 | 1013 | 1977 |
| RARA | 2958 | 3242 | 3075 | 1784 | 1989 | 1972 |
| UPP1 | 3820 | 5080 | 2670 | 2496 | 2796 | 2102 |
| GPT2 | 4599 | 4264 | 2684 | 2544 | 2551 | 1070 |
| SYTL1 | 2469 | 3312 | 2524 | 831 | 1750 | 1845 |
| RELT | 2886 | 2576 | 2895 | 1241 | 1509 | 2091 |
| AK4 | 4128 | 3683 | 2354 | 478 | 751 | 1709 |
| DEDD2 | 818 | 785 | 836 | 434 | 521 | 512 |
| CHST2 | 3730 | 2418 | 1647 | 1567 | 1645 | 543 |
| CLN8 | 1338 | 1507 | 1677 | 575 | 720 | 873 |
| HPCAL1 | 2021 | 2304 | 1774 | 666 | 627 | 1087 |
| SLC35E1 | 3001 | 2649 | 2463 | 1433 | 1377 | 1364 |
| ZNF331 | 1887 | 1853 | 3659 | 535 | 1175 | 1246 |
| ZDBF2 | 3669 | 1919 | 4815 | 1383 | 1611 | 1438 |
| SH3TC1 | 1369 | 1761 | 2183 | 759 | 1103 | 765 |
| ELL2 | 2720 | 2021 | 3809 | 1700 | 1854 | 1476 |
| WDR45B | 3033 | 2907 | 2648 | 1104 | 1308 | 2110 |
| MAFF | 4748 | 3633 | 4216 | 1239 | 1073 | 1411 |
| MYLIP | 3461 | 2870 | 1732 | 1846 | 1565 | 1275 |
| PAF1 | 1534 | 1641 | 2006 | 967 | 1313 | 1019 |
| SPHK1 | 2395 | 2997 | 3186 | 1774 | 2168 | 1986 |
| ZFAND2A | 1368 | 1042 | 1121 | 490 | 562 | 393 |
| STX4 | 1523 | 1270 | 1635 | 933 | 1011 | 781 |
| NARF | 1802 | 1853 | 1762 | 644 | 866 | 1020 |
| UAP1L1 | 1112 | 1283 | 1042 | 330 | 412 | 825 |
| TPD52 | 1469 | 1524 | 1282 | 610 | 953 | 1017 |
| PNPLA8 | 1964 | 1298 | 1841 | 1061 | 935 | 1182 |
| GPR183 | 2320 | 1830 | 2189 | 1246 | 1272 | 866 |
| RIT1 | 1970 | 1163 | 1242 | 548 | 507 | 655 |
| FAM210A | 3057 | 2711 | 3034 | 960 | 931 | 1887 |
| CRIM1 | 3286 | 1598 | 1788 | 1338 | 1078 | 414 |
| CTDP1 | 2026 | 1927 | 1860 | 1164 | 1084 | 960 |
| CRELD2 | 1096 | 1392 | 1805 | 477 | 747 | 1055 |
| ETV3 | 1916 | 1093 | 3313 | 688 | 885 | 1004 |
| PPME1 | 2952 | 2841 | 2005 | 688 | 847 | 831 |
| PIK3C3 | 1819 | 1519 | 1422 | 1113 | 1389 | 1141 |
| JMJD6 | 2522 | 2066 | 2031 | 1025 | 953 | 1433 |
| ZCCHC2 | 1820 | 1177 | 1764 | 983 | 1050 | 891 |
| CERK | 1216 | 997 | 1052 | 398 | 667 | 482 |
| FAM168A | 1539 | 1388 | 1593 | 616 | 990 | 625 |
| LIMD1 | 1173 | 1024 | 850 | 644 | 872 | 590 |
| C7orf50 | 1070 | 1356 | 1068 | 311 | 395 | 530 |
| SPOCK2 | 1060 | 863 | 1299 | 496 | 599 | 536 |
| PLIN2 | 2170 | 1563 | 997 | 1024 | 808 | 542 |
| SH3GL1 | 1991 | 2054 | 1795 | 857 | 966 | 1174 |
| ARL4C | 1840 | 1816 | 2344 | 1244 | 1473 | 1404 |
| SERTAD1 | 2745 | 2607 | 2077 | 686 | 764 | 1079 |
| ERF | 1793 | 1814 | 1759 | 980 | 1099 | 1276 |
| ZNF654 | 1616 | 1031 | 1119 | 550 | 664 | 803 |
| BMPR2 | 1317 | 869 | 1025 | 664 | 852 | 623 |
| PXDC1 | 1985 | 2212 | 2029 | 881 | 1184 | 1036 |
| VGLL4 | 1983 | 1643 | 1369 | 445 | 583 | 1080 |
| SLC25A19 | 1731 | 1811 | 1679 | 983 | 1106 | 1014 |
| TOM1 | 677 | 604 | 639 | 497 | 482 | 374 |
| ALG13 | 1505 | 1299 | 1568 | 998 | 1330 | 961 |
| FSCN1 | 1906 | 2151 | 2140 | 396 | 408 | 889 |
| CD5 | 2378 | 2364 | 2841 | 1017 | 1076 | 483 |
| MOAP1 | 1783 | 1477 | 1721 | 1068 | 1133 | 1086 |
| RUNDC1 | 1515 | 1232 | 1280 | 749 | 1169 | 858 |
| SHF | 1144 | 1358 | 1046 | 407 | 722 | 882 |
| FKBP15 | 826 | 945 | 967 | 577 | 922 | 553 |
| MXD1 | 1060 | 1023 | 1001 | 472 | 620 | 816 |
| ATG9A | 1332 | 1376 | 1211 | 645 | 926 | 555 |
| FLT1 | 3732 | 2051 | 1422 | 1394 | 1273 | 736 |
| VAPB | 1104 | 1313 | 1120 | 740 | 1022 | 782 |
| SRA1 | 1244 | 1151 | 1222 | 713 | 814 | 480 |
| KCNC3 | 1053 | 1156 | 990 | 558 | 851 | 424 |
| KCTD5 | 1123 | 1047 | 1008 | 835 | 868 | 518 |
| SPTBN4 | 1305 | 709 | 863 | 185 | 133 | 129 |
| RAP2B | 1038 | 872 | 886 | 463 | 583 | 510 |
| PNPLA7 | 643 | 564 | 537 | 260 | 339 | 303 |
| PER2 | 1748 | 1239 | 1679 | 899 | 1061 | 1147 |
| PPP1R3E | 503 | 680 | 579 | 99 | 308 | 366 |
| ATP7A | 699 | 617 | 583 | 275 | 447 | 357 |
| PRKRIP1 | 1304 | 1219 | 1038 | 560 | 688 | 538 |
| NUMBL | 974 | 1034 | 1248 | 494 | 539 | 743 |
| PIGA | 1998 | 1165 | 1775 | 590 | 607 | 812 |
| RMND5B | 1061 | 1095 | 939 | 525 | 618 | 623 |
| BCKDK | 890 | 1140 | 764 | 654 | 835 | 566 |
| ZNF394 | 853 | 738 | 951 | 598 | 748 | 591 |
| ISCA1 | 1268 | 1012 | 947 | 773 | 749 | 591 |
| CREB3 | 746 | 880 | 864 | 486 | 715 | 445 |
| C4orf3 | 945 | 1046 | 739 | 310 | 387 | 655 |
| UPRT | 2320 | 2109 | 1386 | 344 | 505 | 485 |
| IPMK | 1785 | 1136 | 1274 | 544 | 586 | 965 |
| SIRT2 | 728 | 664 | 678 | 489 | 692 | 432 |
| THUMPD3-AS1 | 718 | 494 | 701 | 439 | 495 | 366 |
| RNF24 | 1115 | 925 | 936 | 492 | 665 | 615 |
| RGS2 | 921 | 933 | 1272 | 493 | 794 | 297 |
| FBXO42 | 1124 | 879 | 763 | 512 | 481 | 534 |
| GABARAPL1 | 800 | 466 | 732 | 411 | 516 | 339 |
| APBB3 | 519 | 543 | 626 | 278 | 380 | 328 |
| DNAJC4 | 904 | 1105 | 881 | 585 | 829 | 498 |
| POLR2H | 1091 | 1083 | 874 | 701 | 931 | 719 |
| CASP9 | 902 | 1141 | 1829 | 515 | 723 | 338 |
| DCXR | 613 | 701 | 652 | 515 | 602 | 393 |
| TBC1D27P | 771 | 1238 | 1079 | 276 | 797 | 594 |
| BLVRB | 677 | 660 | 665 | 171 | 186 | 321 |
| ESR2 | 1071 | 1096 | 1766 | 375 | 775 | 620 |
| KCTD11 | 1517 | 1367 | 1211 | 172 | 233 | 674 |
| CDK5R1 | 1307 | 1208 | 1407 | 933 | 1255 | 825 |
| TSPOAP1 | 1140 | 1349 | 1799 | 590 | 1146 | 535 |
| GPER1 | 515 | 463 | 233 | 33 | 27 | 112 |
| HIC1 | 1635 | 1901 | 1591 | 771 | 862 | 1034 |
| ADPRS | 945 | 859 | 737 | 647 | 649 | 515 |
| GALNS | 913 | 691 | 750 | 609 | 597 | 384 |
| VAMP2 | 775 | 946 | 920 | 537 | 776 | 503 |
| DIPK2A | 1509 | 926 | 828 | 378 | 358 | 366 |
| MCRIP2 | 748 | 880 | 715 | 559 | 730 | 426 |
| AL079338.1 | 1456 | 1403 | 522 | 378 | 585 | 179 |
| TLCD3A | 1866 | 1580 | 892 | 363 | 455 | 478 |
| RNF113A | 1050 | 1019 | 840 | 512 | 689 | 589 |
| ZNF667 | 1066 | 829 | 808 | 374 | 675 | 442 |
| PPAN | 1056 | 1173 | 1004 | 658 | 769 | 373 |
| OPA3 | 831 | 717 | 846 | 597 | 593 | 483 |
| AC006001.3 | 716 | 906 | 862 | 521 | 656 | 466 |
| FAM117B | 791 | 653 | 743 | 453 | 632 | 477 |
| ACBD5 | 879 | 797 | 860 | 458 | 623 | 445 |
| ZNF470 | 515 | 565 | 471 | 292 | 478 | 304 |
| QPCTL | 825 | 962 | 988 | 578 | 755 | 272 |
| TMUB2 | 522 | 574 | 843 | 369 | 528 | 363 |
| LGMN | 219 | 332 | 271 | 152 | 182 | 160 |
| P2RY11 | 794 | 1002 | 714 | 429 | 682 | 227 |
| BMT2 | 707 | 617 | 605 | 237 | 270 | 401 |
| NIBAN2 | 1532 | 841 | 678 | 472 | 248 | 228 |
| PGRMC2 | 690 | 664 | 642 | 491 | 586 | 395 |
| RAPGEFL1 | 171 | 130 | 138 | 101 | 86 | 66 |
| TRIB2 | 356 | 299 | 201 | 115 | 194 | 135 |
| FOSL1 | 1058 | 1168 | 1039 | 877 | 946 | 549 |
| ANKRD37 | 975 | 919 | 1163 | 255 | 265 | 697 |
| LINC01128 | 854 | 753 | 887 | 557 | 563 | 482 |
| SDF2 | 625 | 565 | 583 | 407 | 483 | 275 |
| RAB40C | 417 | 394 | 454 | 274 | 311 | 216 |
| PLEKHA8 | 834 | 651 | 812 | 375 | 392 | 433 |
| PPP1R37 | 571 | 593 | 715 | 411 | 524 | 347 |
| RAB20 | 588 | 389 | 338 | 171 | 100 | 231 |
| SIK1B | 1166 | 885 | 778 | 303 | 392 | 207 |
| CERNA2 | 440 | 364 | 273 | 49 | 58 | 50 |
| SRD5A1 | 660 | 763 | 582 | 447 | 600 | 413 |
| SLC37A2 | 371 | 518 | 834 | 194 | 341 | 237 |
| APOL1 | 518 | 666 | 284 | 124 | 287 | 218 |
| PLAUR | 1305 | 1012 | 1087 | 623 | 404 | 637 |
| RXRA | 1168 | 735 | 659 | 181 | 141 | 466 |
| PPP1R13L | 795 | 801 | 818 | 314 | 393 | 461 |
| CISD2 | 599 | 539 | 508 | 371 | 376 | 238 |
| RALGDS | 650 | 647 | 640 | 379 | 402 | 309 |
| C2orf42 | 359 | 407 | 492 | 271 | 367 | 234 |
| TRIM39 | 493 | 501 | 600 | 374 | 471 | 241 |
| ZNF432 | 526 | 520 | 446 | 320 | 476 | 265 |
| C1orf159 | 514 | 551 | 718 | 430 | 491 | 348 |
| PWWP2B | 567 | 522 | 460 | 343 | 484 | 266 |
| ZNF667-AS1 | 562 | 565 | 558 | 337 | 355 | 194 |
| TP53INP2 | 482 | 443 | 542 | 287 | 380 | 224 |
| CRYBB2P1 | 578 | 499 | 410 | 240 | 389 | 328 |
| PPP1R3B | 543 | 235 | 574 | 88 | 91 | 275 |
| SLC25A4 | 569 | 545 | 505 | 304 | 287 | 282 |
| USE1 | 513 | 531 | 568 | 288 | 298 | 320 |
| SNAPC1 | 737 | 614 | 706 | 257 | 200 | 230 |
| ATG9B | 97 | 75 | 41 | 24 | 33 | 21 |
| PIF1 | 354 | 404 | 407 | 160 | 280 | 197 |
| AC099489.1 | 339 | 163 | 225 | 95 | 148 | 67 |
| NAA38 | 366 | 363 | 441 | 193 | 277 | 234 |
| ZNF296 | 523 | 579 | 527 | 161 | 198 | 259 |
| GTF2IRD2B | 163 | 157 | 168 | 68 | 119 | 100 |
| PRR7 | 704 | 790 | 602 | 362 | 466 | 372 |
| RTL8C | 448 | 491 | 312 | 272 | 347 | 183 |
| AC009690.1 | 63 | 34 | 62 | 17 | 19 | 17 |
| KCND1 | 575 | 667 | 739 | 352 | 562 | 479 |
| OXSM | 446 | 399 | 470 | 99 | 163 | 82 |
| SAP30 | 700 | 606 | 601 | 155 | 213 | 379 |
| ZNF829 | 329 | 303 | 389 | 236 | 277 | 223 |
| SCAND2P | 194 | 149 | 92 | 38 | 70 | 45 |
| HIF1A-AS3 | 838 | 660 | 282 | 28 | 40 | 127 |
| DHRS13 | 303 | 323 | 315 | 102 | 178 | 221 |
| TNS1 | 437 | 234 | 153 | 167 | 92 | 98 |
| ALDOA | 583 | 501 | 554 | 97 | 136 | 292 |
| AC138393.1 | 353 | 367 | 381 | 149 | 239 | 211 |
| HAVCR2 | 361 | 436 | 352 | 90 | 223 | 112 |
| DLL1 | 331 | 524 | 900 | 197 | 352 | 88 |
| PANX2 | 312 | 254 | 233 | 42 | 89 | 131 |
| SPSB2 | 656 | 407 | 386 | 83 | 157 | 62 |
| GIPR | 543 | 556 | 423 | 225 | 245 | 97 |
| ITGA6 | 273 | 209 | 184 | 119 | 124 | 87 |
| ORAI3 | 183 | 313 | 236 | 96 | 199 | 129 |
| SERPINE1 | 476 | 323 | 375 | 194 | 153 | 108 |
| TRIM9 | 653 | 372 | 215 | 149 | 201 | 136 |
| GPR146 | 374 | 358 | 206 | 1 | 11 | 43 |
| LRP2BP | 216 | 213 | 196 | 116 | 182 | 132 |
| SPON2 | 436 | 392 | 484 | 73 | 93 | 110 |
| FAM13A-AS1 | 441 | 430 | 452 | 34 | 83 | 255 |
| SWT1 | 277 | 300 | 353 | 176 | 266 | 194 |
| FABP3 | 119 | 117 | 31 | 38 | 34 | 25 |
| PDXP | 261 | 354 | 271 | 168 | 212 | 152 |
| HSPA1L | 27 | 42 | 48 | 12 | 15 | 16 |
| TXNDC17 | 271 | 304 | 288 | 193 | 221 | 143 |
| CSPG4P10 | 129 | 110 | 102 | 55 | 64 | 59 |
| SMOX | 553 | 391 | 427 | 287 | 187 | 76 |
| DUOX2 | 56 | 28 | 19 | 11 | 2 | 0 |
| MC1R | 213 | 249 | 358 | 104 | 163 | 115 |
| NOCT | 334 | 328 | 284 | 107 | 177 | 234 |
| GLI1 | 335 | 281 | 472 | 149 | 333 | 157 |
| TMEM88 | 472 | 417 | 514 | 320 | 378 | 227 |
| AC092053.4 | 583 | 352 | 500 | 216 | 228 | 269 |
| ZNF10 | 134 | 104 | 170 | 61 | 96 | 55 |
| SMAP1 | 306 | 287 | 230 | 178 | 187 | 169 |
| COL7A1 | 209 | 194 | 185 | 71 | 111 | 109 |
| RAB33A | 446 | 506 | 313 | 208 | 221 | 219 |
| PARD6G | 85 | 126 | 124 | 26 | 37 | 7 |
| LINC01145 | 198 | 271 | 196 | 126 | 178 | 102 |
| KIRREL2 | 458 | 482 | 387 | 140 | 198 | 114 |
| ZNF668 | 207 | 165 | 220 | 122 | 170 | 108 |
| WDR83 | 224 | 207 | 190 | 137 | 163 | 114 |
| SERINC2 | 115 | 133 | 117 | 82 | 84 | 40 |
| EMC9 | 216 | 260 | 187 | 72 | 145 | 143 |
| CBARP | 216 | 338 | 292 | 174 | 222 | 135 |
| DUOX1 | 262 | 183 | 219 | 91 | 148 | 110 |
| CCL28 | 174 | 226 | 159 | 72 | 88 | 129 |
| AC091729.1 | 630 | 434 | 206 | 28 | 40 | 75 |
| MTRNR2L8 | 362 | 226 | 357 | 112 | 194 | 159 |
| PSMD6-AS2 | 193 | 134 | 186 | 78 | 94 | 73 |
| EGR4 | 358 | 413 | 526 | 185 | 255 | 122 |
| NLRP3 | 500 | 339 | 498 | 128 | 123 | 64 |
| AC004980.1 | 464 | 239 | 188 | 140 | 139 | 75 |
| AL021707.6 | 249 | 285 | 270 | 108 | 221 | 106 |
| KPTN | 161 | 204 | 322 | 101 | 115 | 61 |
| MTARC1 | 29 | 11 | 131 | 13 | 5 | 9 |
| MROH6 | 227 | 288 | 278 | 92 | 165 | 63 |
| OTUD7A | 270 | 205 | 166 | 88 | 71 | 88 |
| PTAFR | 235 | 261 | 131 | 89 | 78 | 98 |
| AC078883.1 | 236 | 133 | 133 | 23 | 28 | 53 |
| HES4 | 231 | 222 | 411 | 119 | 140 | 89 |
| YJEFN3 | 163 | 170 | 187 | 113 | 130 | 79 |
| LINC01409 | 192 | 141 | 179 | 74 | 93 | 75 |
| SLC8A2 | 224 | 233 | 509 | 12 | 52 | 15 |
| PARD6G-AS1 | 52 | 37 | 90 | 15 | 26 | 7 |
| KIAA1614 | 100 | 88 | 112 | 32 | 75 | 34 |
| AC107959.1 | 254 | 296 | 165 | 90 | 162 | 18 |
| AL162274.1 | 181 | 79 | 119 | 4 | 8 | 56 |
| NPHS1 | 383 | 289 | 293 | 98 | 101 | 22 |
| C15orf48 | 161 | 143 | 113 | 81 | 31 | 55 |
| AC090617.5 | 280 | 335 | 323 | 66 | 94 | 63 |
| PLCD1 | 100 | 73 | 123 | 42 | 54 | 53 |
| SEC14L2 | 121 | 98 | 120 | 29 | 54 | 53 |
| APLP1 | 226 | 174 | 177 | 84 | 117 | 60 |
| AC104581.4 | 198 | 129 | 204 | 70 | 105 | 61 |
| MPND | 122 | 104 | 88 | 49 | 79 | 57 |
| ATP6V1FNB | 151 | 76 | 134 | 49 | 76 | 25 |
| NOP2 | 157 | 118 | 154 | 60 | 79 | 46 |
| LPAR6 | 253 | 229 | 260 | 108 | 101 | 95 |
| VKORC1 | 116 | 141 | 137 | 83 | 105 | 67 |
| KCNIP2 | 136 | 181 | 126 | 37 | 68 | 52 |
| FHDC1 | 265 | 151 | 140 | 61 | 96 | 22 |
| ASTL | 207 | 196 | 240 | 93 | 128 | 141 |
| STAC2 | 122 | 81 | 39 | 32 | 29 | 28 |
| DSTNP2 | 256 | 182 | 170 | 26 | 26 | 20 |
| MTUS2-AS1 | 120 | 64 | 58 | 16 | 42 | 2 |
| AC105046.1 | 333 | 188 | 191 | 106 | 93 | 145 |
| HTR3A | 294 | 157 | 142 | 84 | 65 | 84 |
| ATP2A1 | 156 | 146 | 125 | 54 | 122 | 55 |
| DPP4 | 221 | 234 | 156 | 96 | 146 | 52 |
| MTX1P1 | 46 | 72 | 101 | 23 | 47 | 29 |
| AP001062.1 | 140 | 164 | 105 | 58 | 113 | 38 |
| AC009690.2 | 17 | 17 | 52 | 6 | 3 | 6 |
| KDM7A-DT | 181 | 97 | 81 | 43 | 37 | 27 |
| CCDC107 | 123 | 101 | 145 | 40 | 51 | 74 |
| AC121761.1 | 164 | 138 | 150 | 85 | 119 | 87 |
| TUBB3 | 23 | 33 | 54 | 8 | 17 | 11 |
| SNRPN | 65 | 96 | 89 | 44 | 45 | 43 |
| GAL3ST2 | 266 | 143 | 146 | 89 | 81 | 84 |
| LY6G5C | 170 | 164 | 174 | 78 | 131 | 55 |
| AL118516.1 | 214 | 168 | 129 | 28 | 54 | 57 |
| FNTB | 110 | 147 | 78 | 41 | 57 | 68 |
| CIART | 106 | 87 | 64 | 29 | 41 | 43 |
| BTBD11 | 92 | 75 | 168 | 42 | 61 | 42 |
| CCDC62 | 120 | 101 | 126 | 44 | 80 | 42 |
| SLC29A4 | 40 | 64 | 65 | 16 | 13 | 26 |
| HSPA4L | 37 | 40 | 54 | 5 | 14 | 14 |
| LINC01679 | 118 | 85 | 153 | 23 | 33 | 60 |
| LINC01138 | 90 | 125 | 82 | 38 | 65 | 52 |
| CYGB | 86 | 149 | 168 | 60 | 85 | 16 |
| ATL1 | 88 | 88 | 49 | 22 | 44 | 27 |
| C17orf107 | 158 | 120 | 246 | 68 | 73 | 39 |
| KCNH3 | 98 | 138 | 73 | 35 | 50 | 28 |
| ADRA2B | 138 | 157 | 178 | 35 | 40 | 65 |
| CCDC17 | 99 | 108 | 150 | 76 | 75 | 50 |
| RPL13P5 | 190 | 154 | 75 | 24 | 16 | 8 |
| AC139100.2 | 37 | 42 | 47 | 9 | 15 | 3 |
| ANK1 | 103 | 81 | 96 | 21 | 50 | 34 |
| PLOD2 | 182 | 71 | 42 | 3 | 4 | 39 |
| AC084117.1 | 184 | 125 | 120 | 14 | 16 | 52 |
| AC009630.4 | 235 | 116 | 159 | 58 | 26 | 46 |
| AL117336.1 | 105 | 96 | 146 | 42 | 67 | 34 |
| GPRC5A | 246 | 98 | 87 | 56 | 35 | 20 |
| SCN1B | 147 | 121 | 187 | 31 | 35 | 27 |
| TACR2 | 166 | 99 | 107 | 20 | 4 | 19 |
| RAB42 | 61 | 56 | 22 | 8 | 8 | 14 |
| MYEOV | 131 | 159 | 135 | 75 | 57 | 33 |
| NAGS | 152 | 110 | 70 | 30 | 50 | 50 |
| ADAMTSL4-AS1 | 81 | 74 | 84 | 39 | 56 | 32 |
| AC008267.3 | 74 | 54 | 82 | 27 | 36 | 15 |
| AL049757.2 | 85 | 101 | 93 | 35 | 48 | 15 |
| RHBDL1 | 92 | 110 | 78 | 28 | 57 | 33 |
| CFAP53 | 92 | 64 | 121 | 20 | 43 | 32 |
| ZNF565 | 50 | 43 | 71 | 21 | 23 | 26 |
| SPRED3 | 101 | 76 | 71 | 17 | 25 | 41 |
| MIF-AS1 | 118 | 44 | 76 | 32 | 26 | 32 |
| RN7SL402P | 120 | 137 | 86 | 56 | 56 | 31 |
| MPP2 | 83 | 76 | 46 | 12 | 26 | 38 |
| LYPD3 | 33 | 29 | 94 | 18 | 15 | 13 |
| AC120049.1 | 50 | 36 | 30 | 10 | 14 | 18 |
| RHOU | 95 | 25 | 23 | 13 | 11 | 5 |
| AL356273.6 | 91 | 50 | 109 | 35 | 38 | 39 |
| PKD1L1 | 70 | 42 | 66 | 21 | 17 | 13 |
| AC120057.3 | 63 | 62 | 94 | 29 | 43 | 19 |
| AC024051.10 | 111 | 101 | 72 | 33 | 26 | 19 |
| TACSTD2 | 212 | 76 | 76 | 8 | 15 | 7 |
| AL021407.3 | 55 | 43 | 55 | 12 | 15 | 5 |
| SLC6A13 | 88 | 70 | 68 | 14 | 29 | 2 |
| NOTCH3 | 31 | 36 | 18 | 10 | 5 | 3 |
| RNF223 | 68 | 54 | 112 | 24 | 27 | 35 |
| AC144831.1 | 93 | 93 | 84 | 27 | 45 | 16 |
| AL591845.1 | 59 | 34 | 56 | 10 | 8 | 8 |
| NXN | 40 | 25 | 29 | 14 | 3 | 4 |
| SLC23A3 | 43 | 23 | 45 | 13 | 8 | 11 |
| BACH1-IT2 | 76 | 38 | 68 | 25 | 28 | 25 |
| AL731571.1 | 94 | 48 | 52 | 28 | 23 | 12 |
| AC104365.3 | 74 | 55 | 71 | 21 | 27 | 11 |
| AL353795.3 | 41 | 24 | 72 | 22 | 10 | 6 |
| AC092053.3 | 61 | 47 | 97 | 20 | 25 | 27 |
| AC253572.2 | 79 | 47 | 56 | 13 | 9 | 32 |
| PRRT1B | 45 | 20 | 58 | 11 | 8 | 3 |
| PPP1R3G | 66 | 35 | 17 | 4 | 1 | 9 |
| NOVA2 | 51 | 28 | 54 | 16 | 16 | 3 |
| LINC00996 | 46 | 30 | 43 | 15 | 16 | 8 |
| AC131392.1 | 21 | 56 | 54 | 3 | 21 | 5 |
| PCAT6 | 49 | 71 | 30 | 4 | 11 | 24 |
| AC087164.1 | 60 | 39 | 44 | 4 | 4 | 11 |
| RPL35AP32 | 46 | 31 | 36 | 10 | 15 | 16 |
| AC027031.2 | 40 | 61 | 49 | 8 | 13 | 17 |
| BX323046.2 | 17 | 11 | 19 | 4 | 2 | 0 |
| CAMK2N2 | 36 | 41 | 49 | 13 | 18 | 4 |
| AL355377.3 | 14 | 23 | 37 | 5 | 4 | 2 |
| AC010655.2 | 45 | 47 | 17 | 0 | 2 | 2 |
| PRODH2 | 72 | 30 | 20 | 5 | 4 | 1 |
| ATP6V0CP4 | 34 | 41 | 58 | 10 | 8 | 7 |
| AC068946.1 | 18 | 19 | 9 | 2 | 3 | 2 |
| MIR212 | 23 | 59 | 50 | 8 | 14 | 6 |
| PERCC1 | 36 | 33 | 27 | 6 | 9 | 0 |
| EPHA8 | 13 | 26 | 21 | 0 | 1 | 2 |
| DUOXA1 | 51 | 15 | 29 | 4 | 14 | 2 |
| DBIL5P | 28 | 32 | 35 | 4 | 4 | 5 |
| PDLIM3 | 29 | 16 | 41 | 5 | 3 | 6 |
| TAC3 | 26 | 29 | 17 | 7 | 8 | 3 |
| AC007448.5 | 35 | 29 | 23 | 1 | 4 | 2 |
| TGFBR3L | 16 | 14 | 17 | 1 | 4 | 1 |
| GJB7 | 42 | 19 | 8 | 3 | 6 | 2 |
| CASQ1 | 28 | 19 | 32 | 10 | 9 | 3 |
| LMAN1L | 30 | 33 | 16 | 3 | 8 | 2 |
| BGLAP | 10 | 19 | 23 | 3 | 4 | 3 |
| EIF1P6 | 19 | 28 | 17 | 6 | 5 | 2 |
| OVOL1-AS1 | 24 | 7 | 21 | 1 | 0 | 2 |
| ENO1-AS1 | 16 | 14 | 19 | 2 | 3 | 1 |
| TAL1 | 31 | 10 | 17 | 4 | 2 | 0 |
| AC010335.1 | 20 | 18 | 14 | 4 | 1 | 1 |

**Supplemental figures**

**
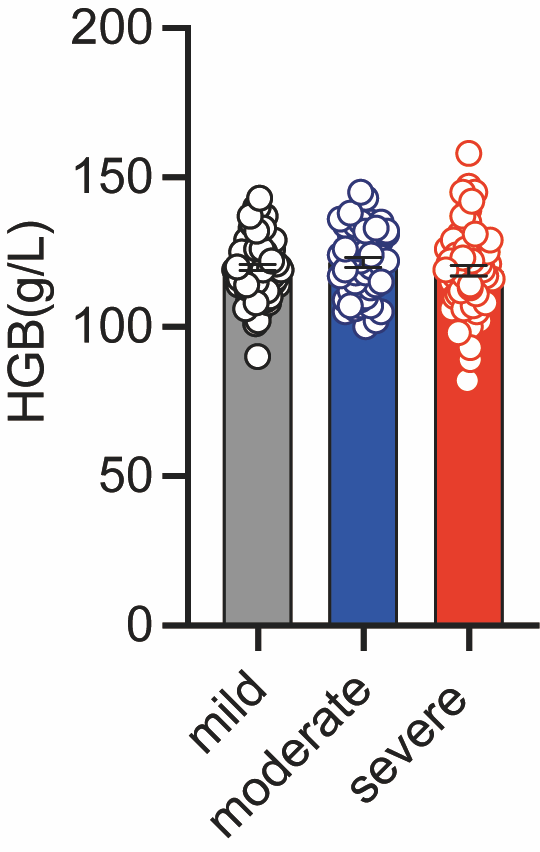
**

**Supplemental Figure 1.** The levels of hemoglobin (HGB) in pediatric AD. The levels of HGB in peripheral blood of children with mild (n=100), moderate (n=48), and severe AD (n=69). No significant differences were observed (Ordinary one-way ANOVA and Tukey’s multiple comparisons test was used).


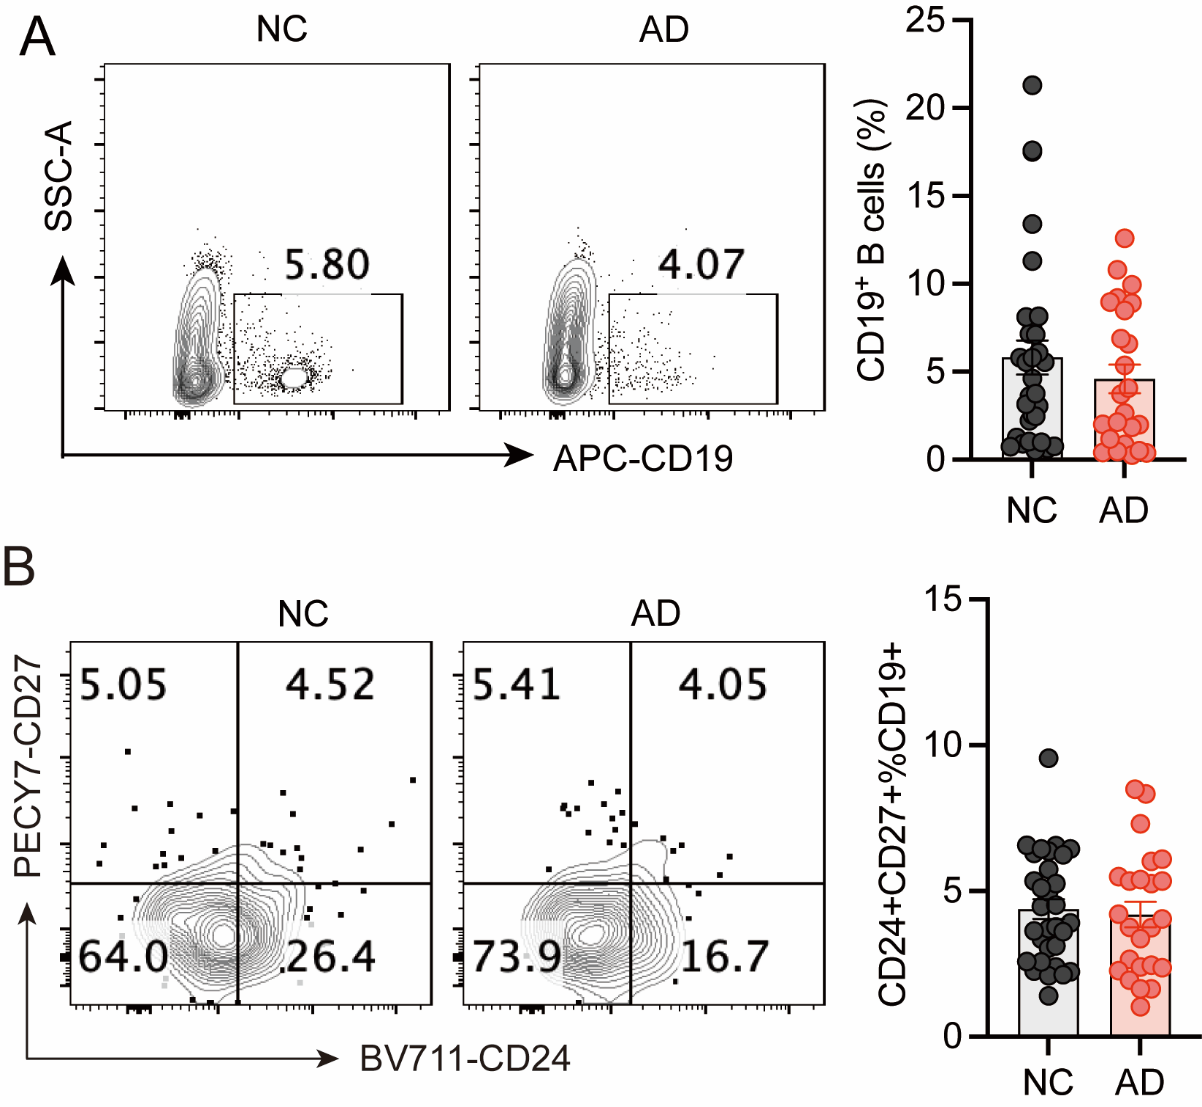


**Supplemental Figure 2.** The percentage of CD19+ B cells and CD24+CD27+CD19+ Breg cells in pediatric AD. Representative flow cytometry and quantification of CD19+ B cells (A) and CD24+CD27+CD19+ Breg cells (B) in healthy donors (n=31) and children with AD (n=24). No significant differences were observed (Unpaired 2-tailed Student’s *t* test for A and B).

**
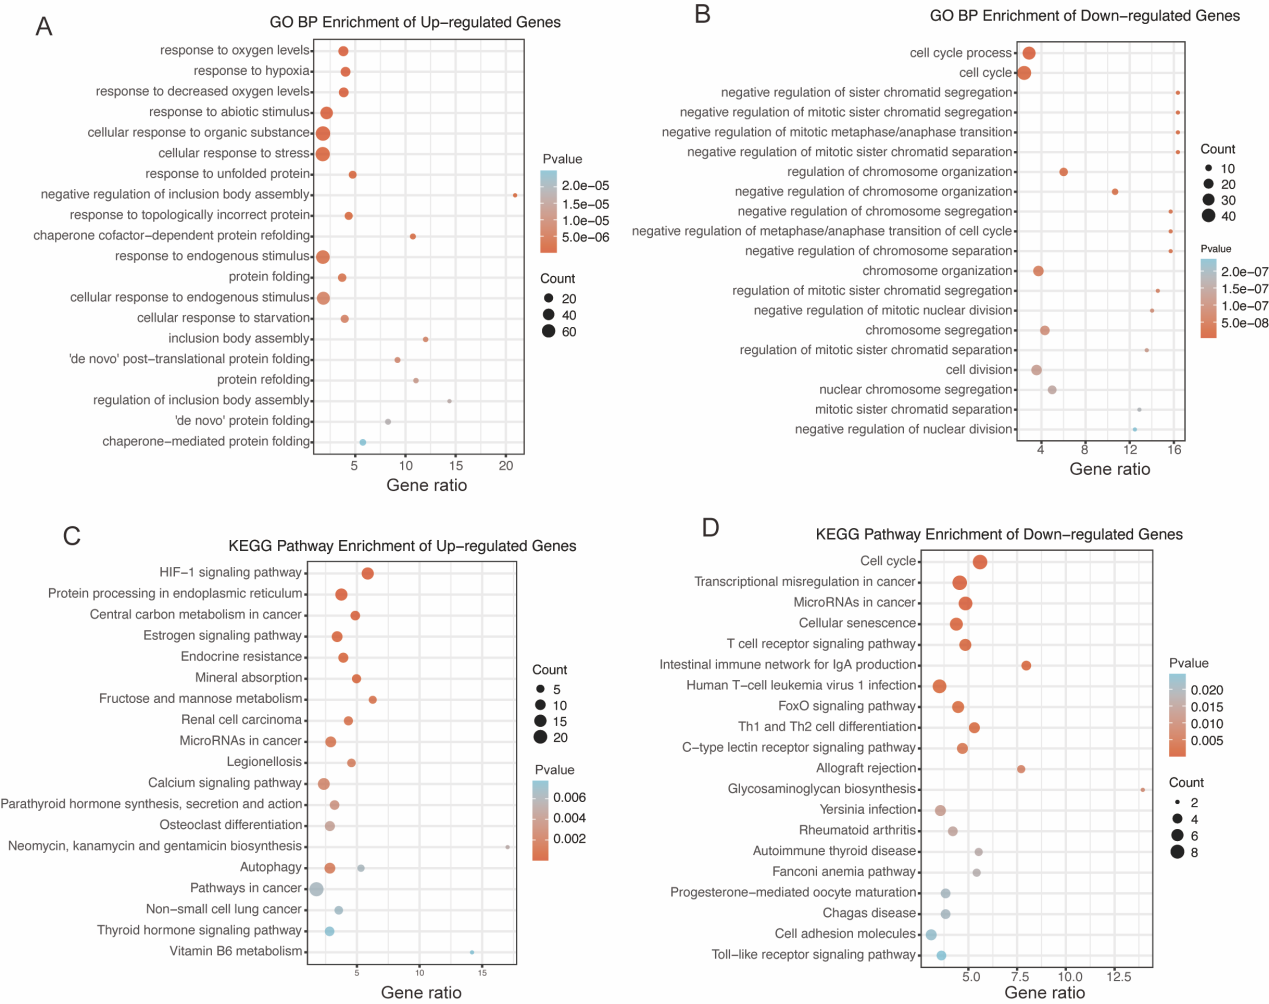
**

**Supplemental Figure 3.** The functional enrichment analysis of the differentially expressed genes. The top biological processes (BP) enriched in CPX (A) and DMSO (B). The significantly enriched KEGG pathways in CPX (C) and DMSO (D).


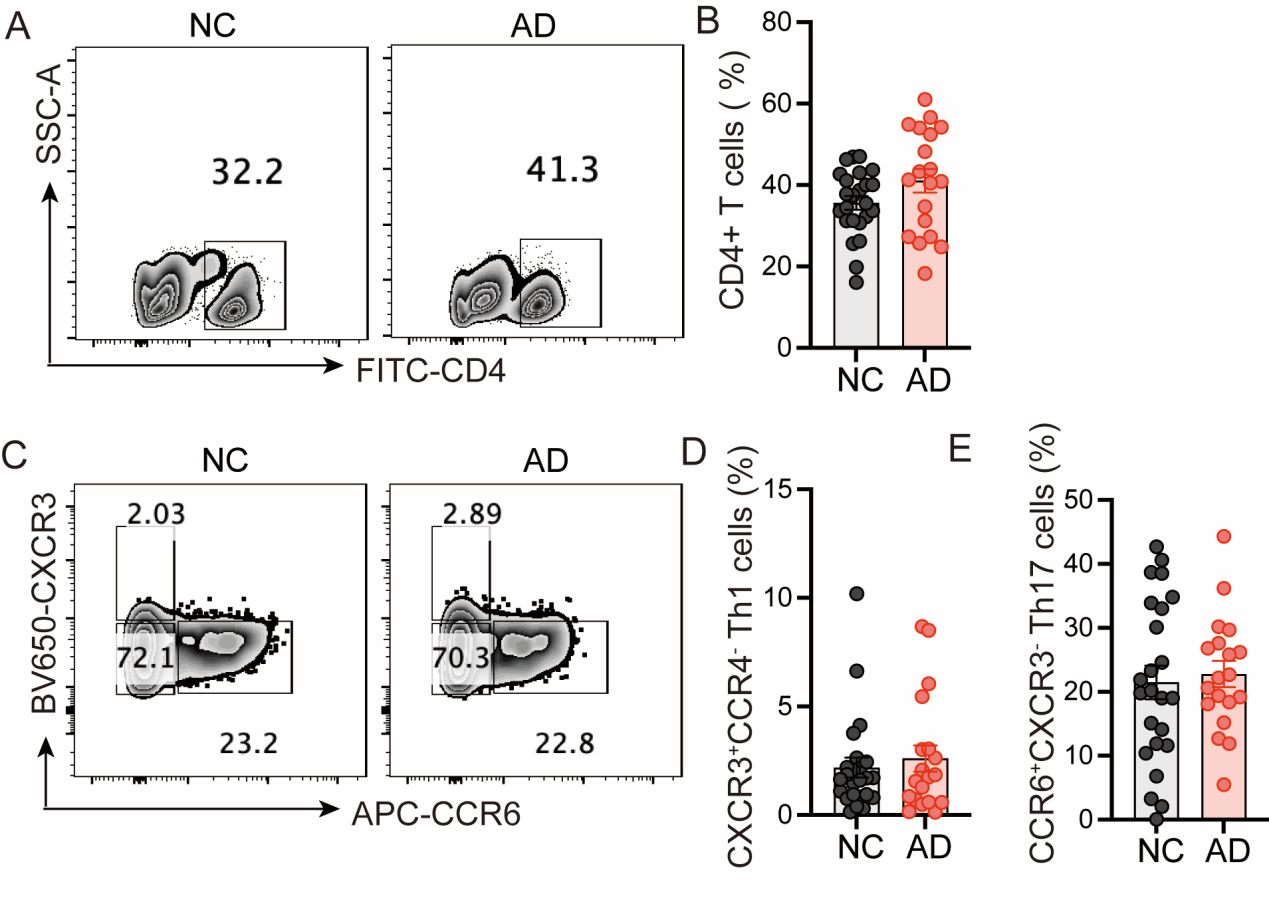


**Supplemental Figure 4.** The proportions of CD4+ T cells, Th1, and Th17 cells between AD patients and healthy controls. (A and B) Representative flow cytometry (A) and quantification (B) of CD4+ T cells in healthy controls (n=24) and children with AD (n=19). (C-E) Representative flow cytometry (C) and quantification of CD4+CXCR3+CCR6- Th1 cells (D), and CD4+CCR6+CXCR3- Th17 cells (E) in healthy controls (n=24) and children with AD (n=20). No significant differences were observed (unpaired 2-tailed Student’s *t* test for B, D and E).
